# Supplementary material for: Improving the emission quantum yield in dinuclear Eu(iii) and Tb(iii) complexes with 2-fluorobenzoate
Source: Royal Society of Chemistry journal article supplement (doi:10.1039/d1nj04335h), 2021-01-01
Supplement: d1nj04335h1.pdf [file d1nj04335h1.pdf]

## Improving the emission quantum yield in dinuclear Eu(III) and Tb(III) complexes with 2-fluorobenzoate.

Ànnia Tubau, Laura Rodríguez, Ariadna Lázaro, Ramon Vicente and Mercè Font-Bardía.

### SUPPLEMENTARY INFORMATION:

| Crystal Data                                                                                                   | Compound 1                                                                     |
|----------------------------------------------------------------------------------------------------------------|--------------------------------------------------------------------------------|
| Formula                                                                                                        | C <sub>56</sub> H <sub>38</sub> Eu <sub>2</sub> F <sub>8</sub> O <sub>18</sub> |
| FW [g/mol]                                                                                                     | 1454.78                                                                        |
| Crystal System                                                                                                 | triclinic                                                                      |
| Space Group                                                                                                    | P-1                                                                            |
| a [Å]                                                                                                          | 9.095(8)                                                                       |
| b [Å]                                                                                                          | 11.378(10)                                                                     |
| c [Å]                                                                                                          | 13.659(12)                                                                     |
| α[deg]                                                                                                         | 110.68(3)                                                                      |
| β [deg]                                                                                                        | 93.12(3)                                                                       |
| γ [deg]                                                                                                        | 92.45(3)                                                                       |
| V [Å <sup>3</sup> ]                                                                                            | 1317.6(2)                                                                      |
| Z                                                                                                              | 1                                                                              |
| T(K)                                                                                                           | 100(2)                                                                         |
| λ(Mo Kα) (Å)                                                                                                   | 0.71073                                                                        |
| D <sub>calc</sub> [g cm <sup>-3</sup> ]                                                                        | 1.833                                                                          |
| μ(Mo Kα) [mm <sup>-1</sup> ]                                                                                   | 2.464                                                                          |
| R                                                                                                              | 0.0199                                                                         |
| wR <sub>2</sub>                                                                                                | 0.0467                                                                         |
| <b>Table S1.</b> Crystal data and single crystal X-Ray diffraction measurement details for compound <b>1</b> . |                                                                                |

|                                                                                                                                                                       |           |           |           |
|-----------------------------------------------------------------------------------------------------------------------------------------------------------------------|-----------|-----------|-----------|
| Eu1-O1                                                                                                                                                                | 2.586(13) | Eu1-O6 a  | 2.463(14) |
| Eu1-O2                                                                                                                                                                | 2.430(13) | Eu1-O7    | 2.481(13) |
| Eu1-O3                                                                                                                                                                | 2.354(13) | Eu1-O9    | 2.427(13) |
| Eu1-O4                                                                                                                                                                | 2.356(13) | Eu1---Eu1 | 3.964(3)  |
| Eu1-O5                                                                                                                                                                | 2.638(13) | O1-Eu1-O2 | 51.69(4)  |
| Eu1-O5_a                                                                                                                                                              | 2.638(13) | Eu-O_a-Eu | 105.19(5) |
| <b>Table S2.</b> Selected bond lengths (Å) and angles (°) for compound <b>1</b> . The symmetry transformation used to generate equivalent atoms is _a: -x+1,-y+1,-z+2 |           |           |           |

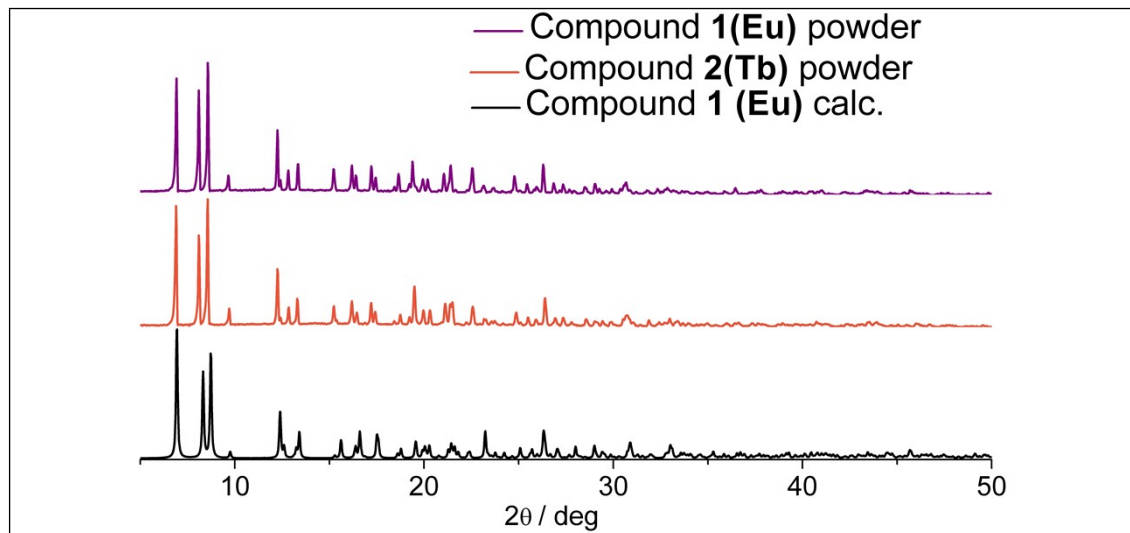

**Figure S1.** Calculated powder pattern of the single crystal (black line) compared with the experimental powder X-ray diffraction of the phase pure compounds (orange and purple lines). Single crystal X-Ray diffraction was measured at 100 K and Powder X-Ray diffraction was measured at room temperature.

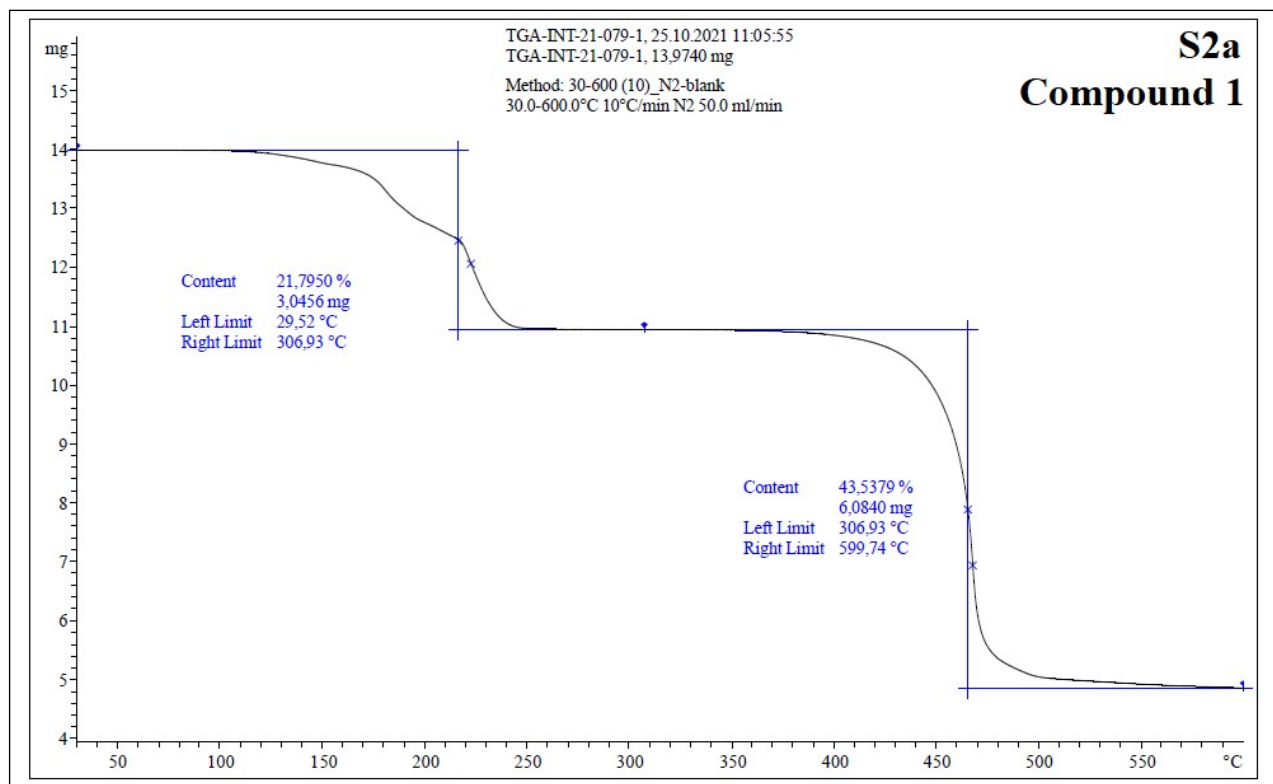

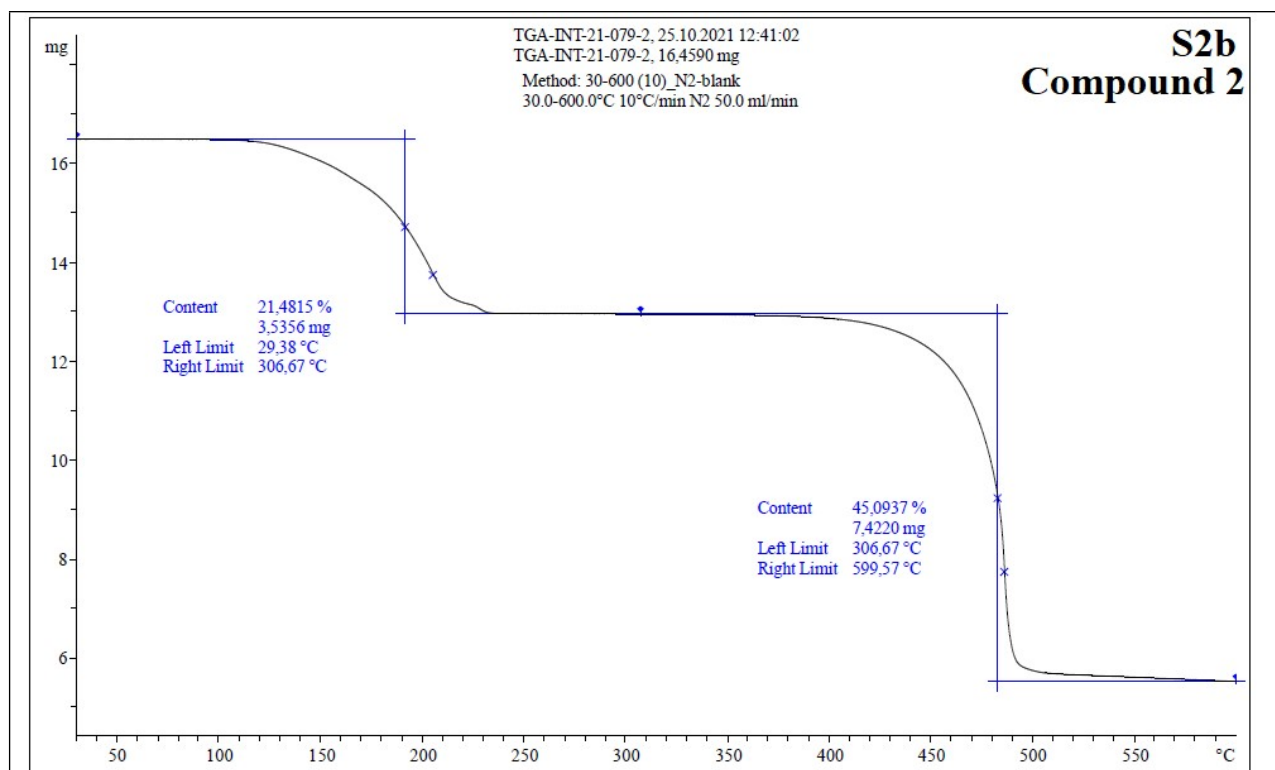

**Figures S2a and S2b.** Thermogravimetry measurements for compounds 1 (Sa1) and 2 (Sa2). The measurement is performed in the 30–600 °C temperature range and under N<sub>2</sub> atmosphere, with a heating rate of 10 °C min<sup>-1</sup>

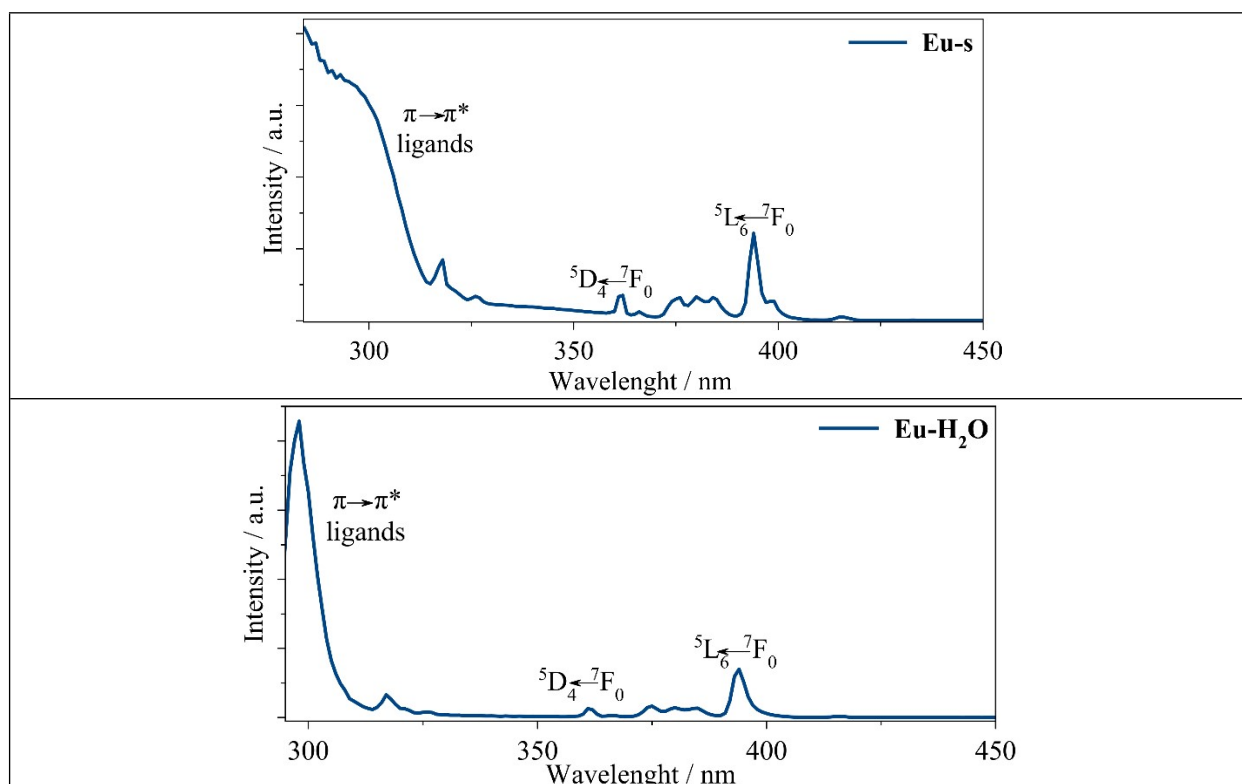

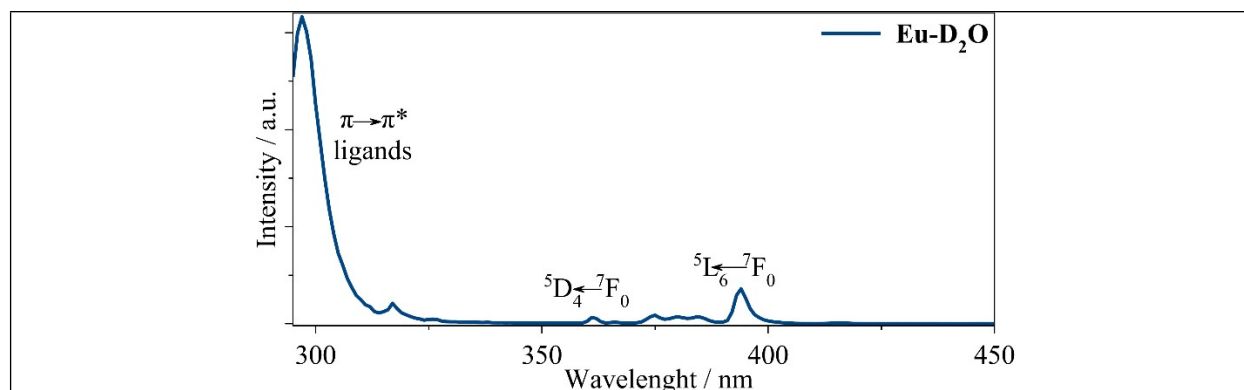

**Figure S3.** Excitation spectra of compound **1** in the microcrystalline sample (Eu-s), dissolved in water (Eu-H<sub>2</sub>O) and in deuterium oxide (Eu-D<sub>2</sub>O). Excitation spectra were recorded at  $\lambda_{em}$  of 617 nm ( $^5D_0 \rightarrow ^7F_2$ ).

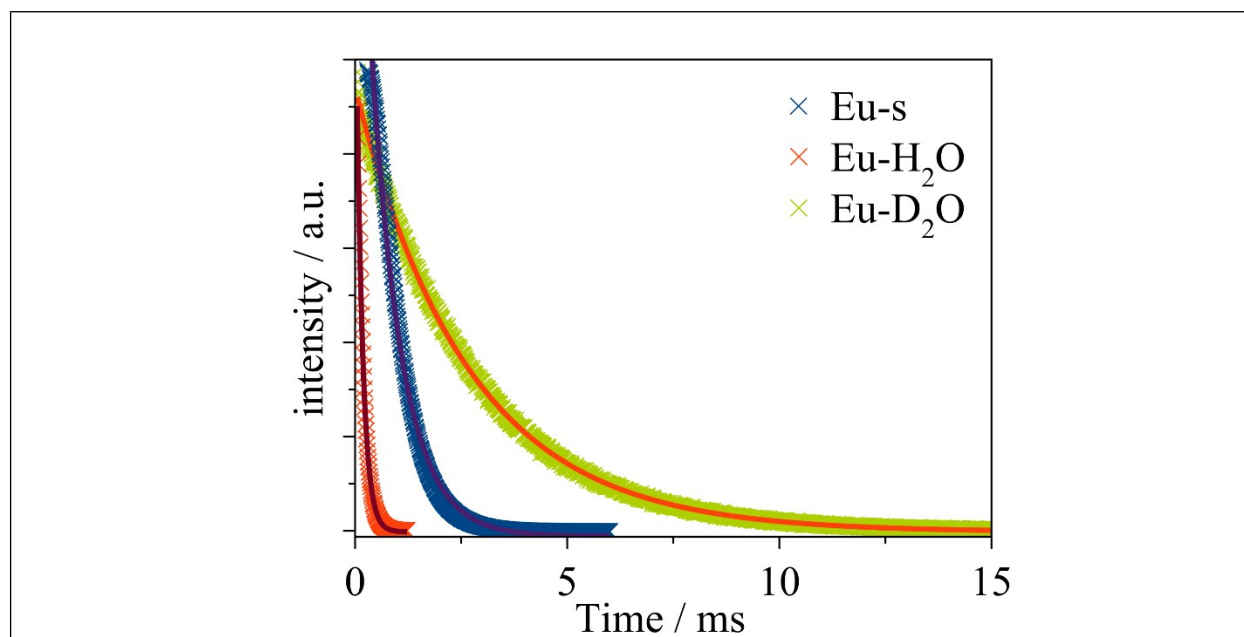

**Figure S4.** Time decay curves at r.t. for compound **1** in the microcrystalline sample (Eu-s), dissolved in water (Eu-H<sub>2</sub>O) and in deuterium oxide (Eu-D<sub>2</sub>O). Thick and continuous lines represent the monoexponential fittings of the curves. ( $I(t) = I_0 \exp(-t/\tau_{obs})$ )

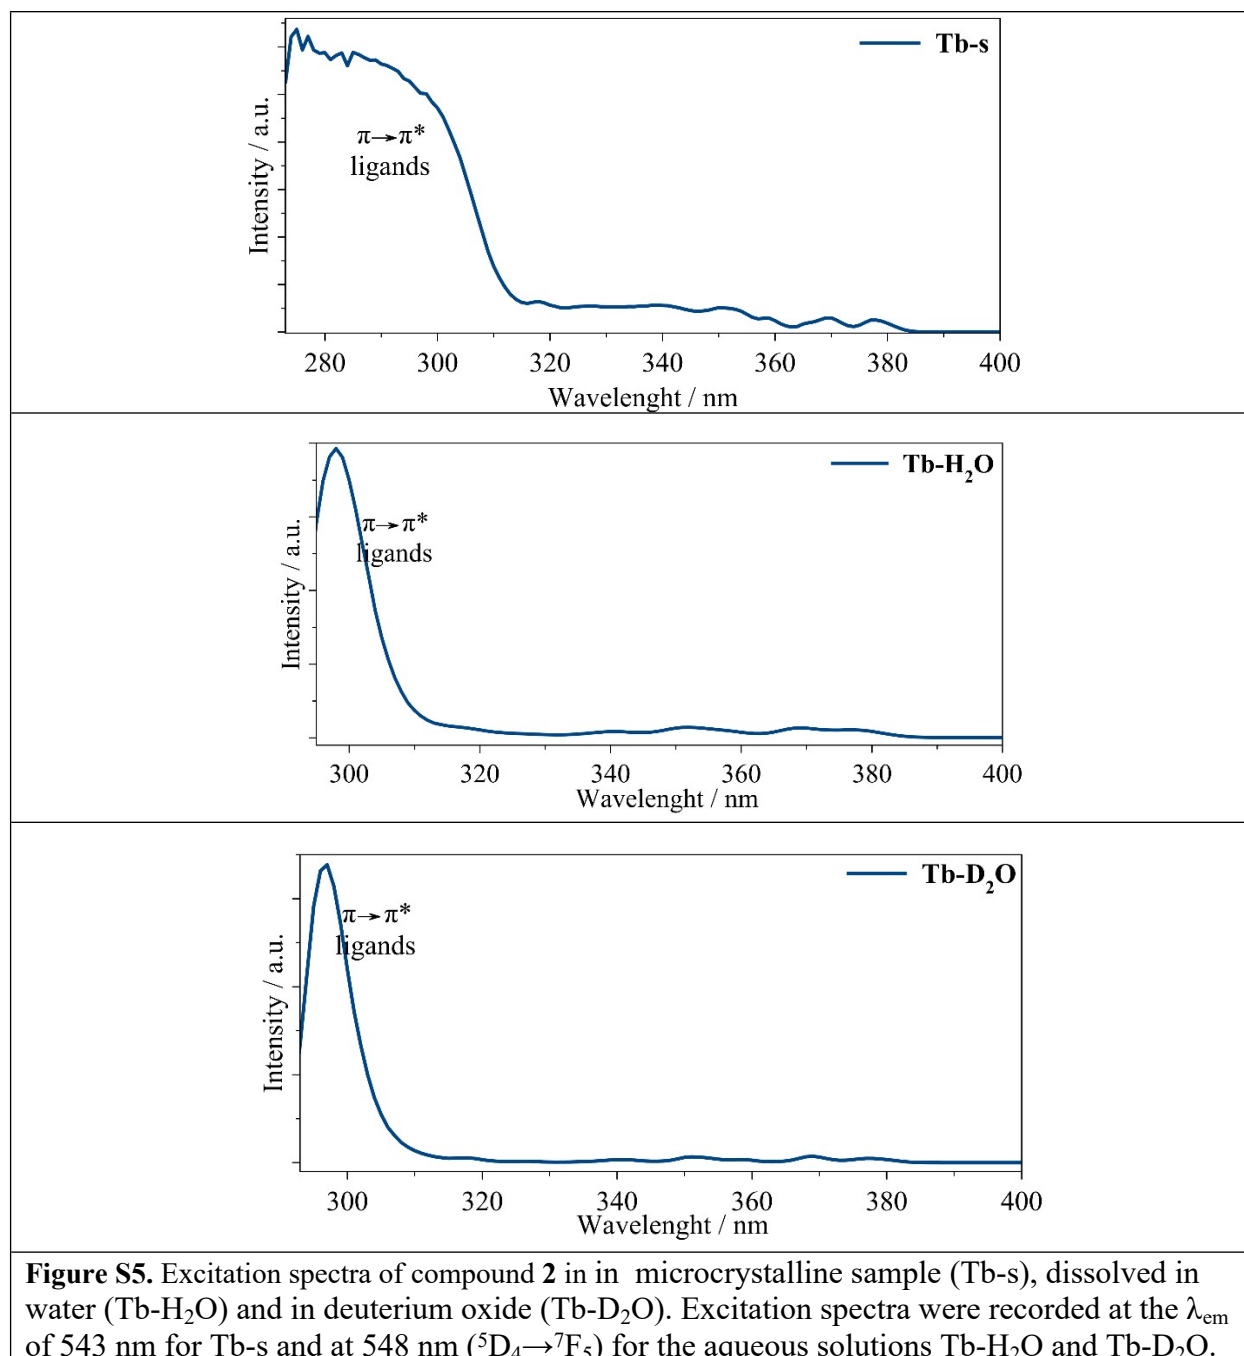

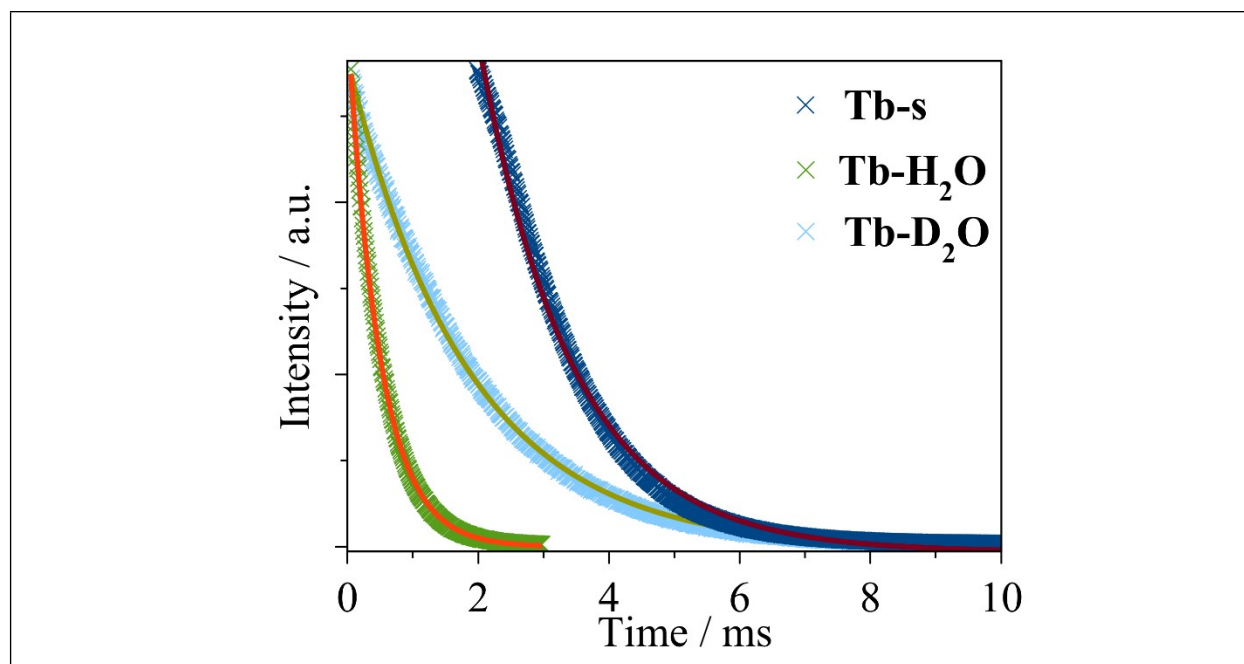

**Figure S6.** Time decay curves at r.t. for compound **2** in microcrystalline sample (Tb-s), dissolved in water (Tb-H<sub>2</sub>O) and in deuterium oxide (Tb-D<sub>2</sub>O). Thick and continuous lines represent the monoexponential fittings of the curves. ( $I(t) = I_0 \exp(-t/\tau_{\text{obs}})$ )

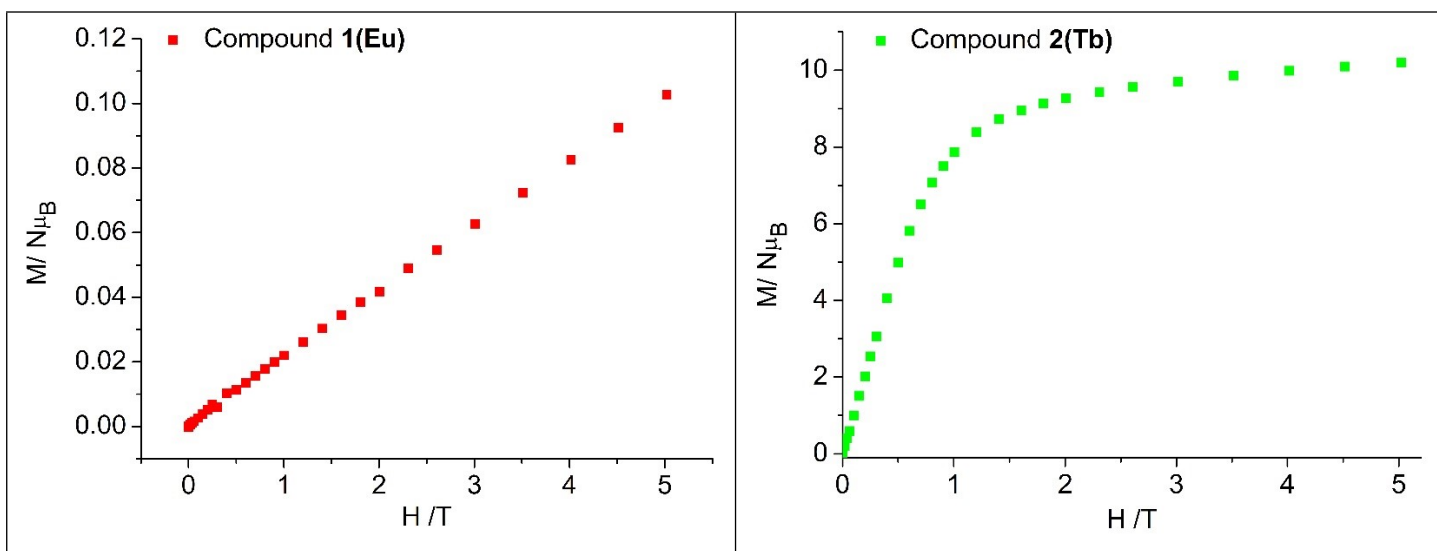

**Figure S7.** Magnetization dependency in front of the dc magnetic field at 2K for compounds **1**(red) and **2**(green)
